# Supplementary material
Source: PubMed Central journal article supplement (PMC4793568)

Figure S2. Cumulative incidence of cervical intraepithelial neoplasia grade 3 or worse (CIN3+) over 13 years of follow-up by baseline test result, study arms combined (test result groups not mutually exclusive)

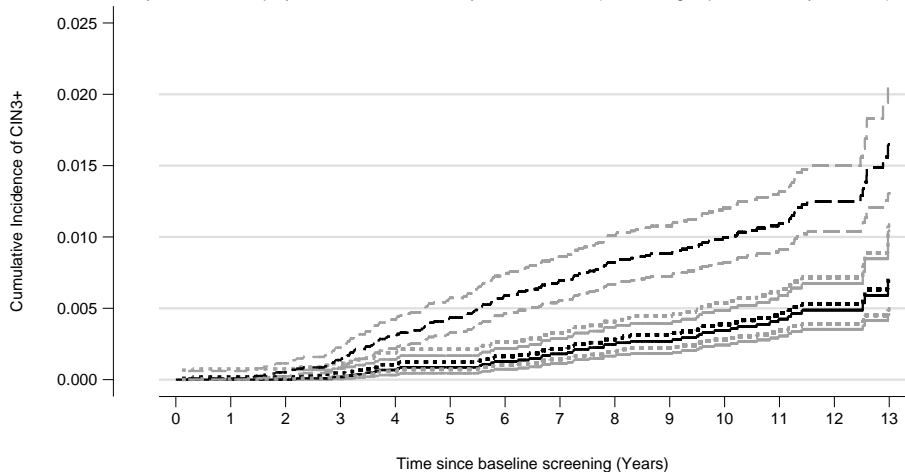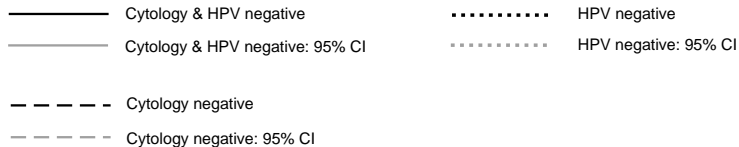

Supplement: elfk013293.wf2_default.pdf [file elfk013293.wf2_default.pdf]
